# Supplementary material
Source: PubMed Central journal article supplement (PMC5734028)
Supplement: AEM.01443-17_zam001188215s1.pdf [file AEM.01443-17_zam001188215s1.pdf]

# Supplementary Figure 1

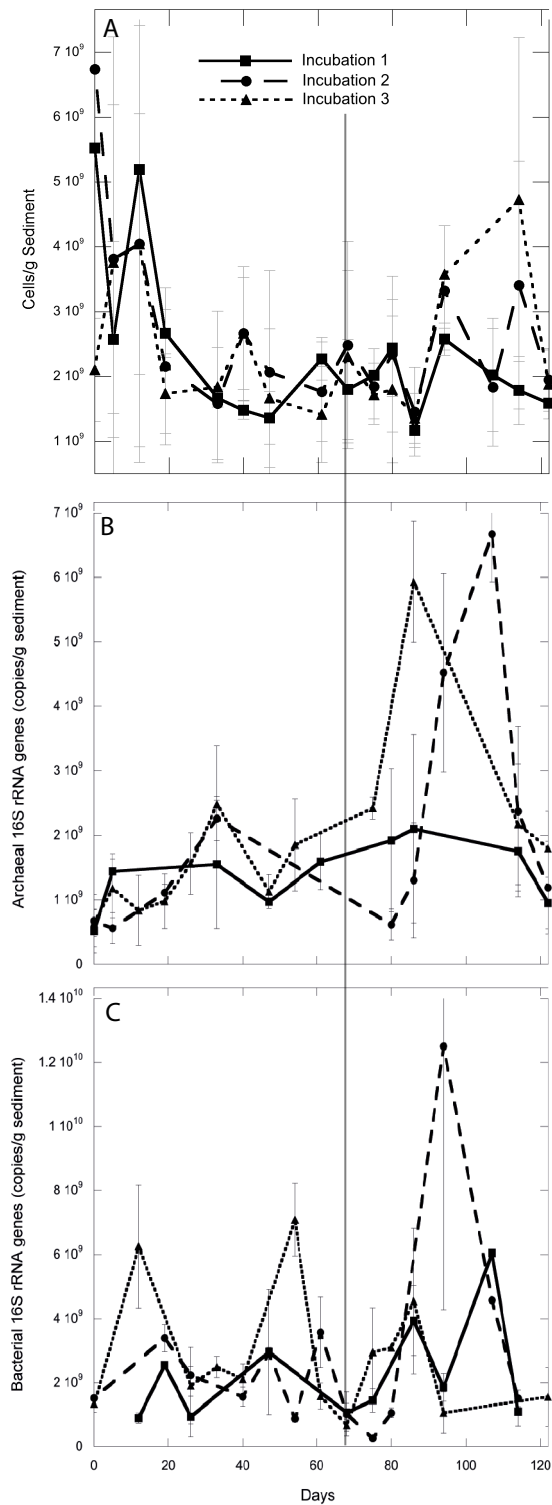

Supplemental Figure 1. (A) Epifluorescence direct cell counts of total microbes during the course of sampling using SYBRGold DNA staining. Copies of 16S rRNA genes measured by qPCR for (B) Archaea and (C) Bacteria are shown as the mean of replicate measurements for each incubation. Error bars represent the standard deviation of each sample. X-axis label applies to all panels. Vertical line notes the point of sulfate depletion.
